# Supplementary material
Source: PubMed Central journal article supplement (PMC4106248)

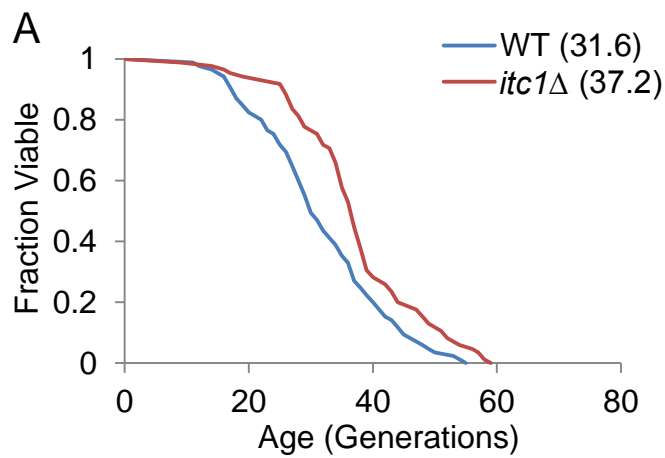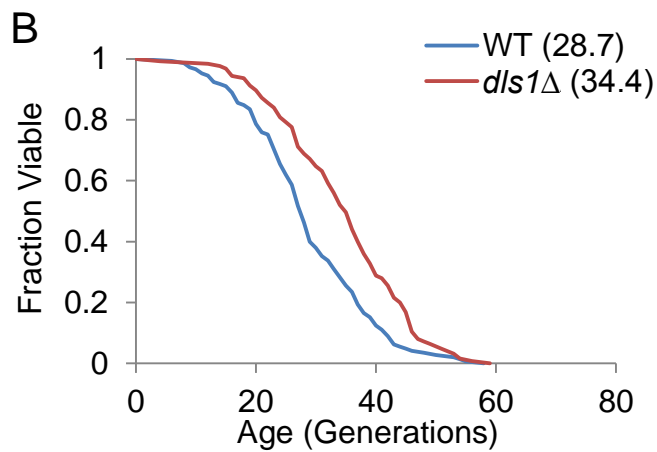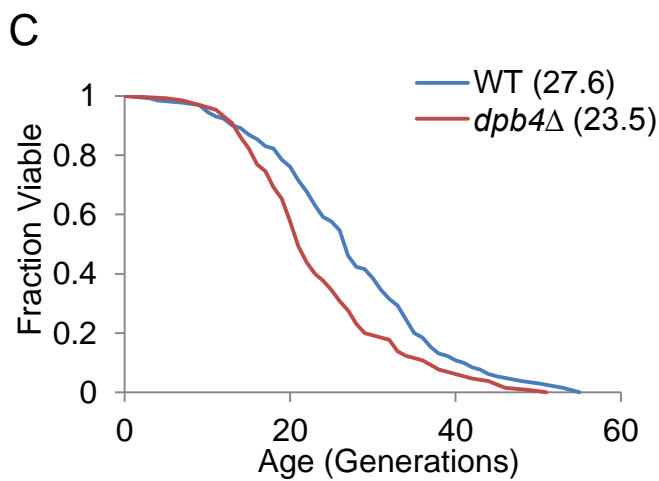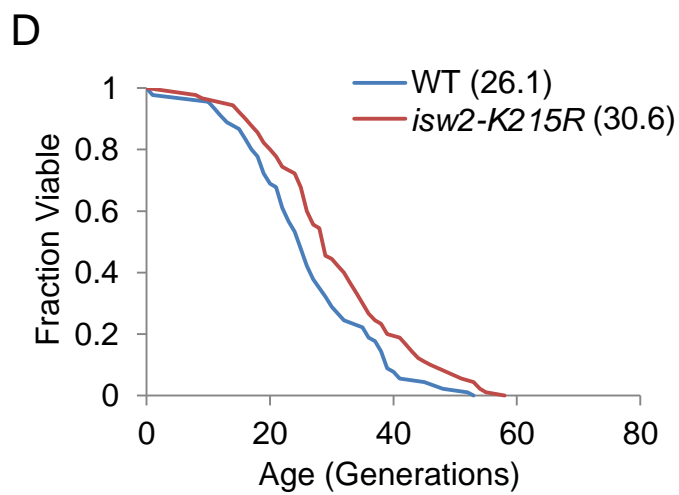

Figure S2

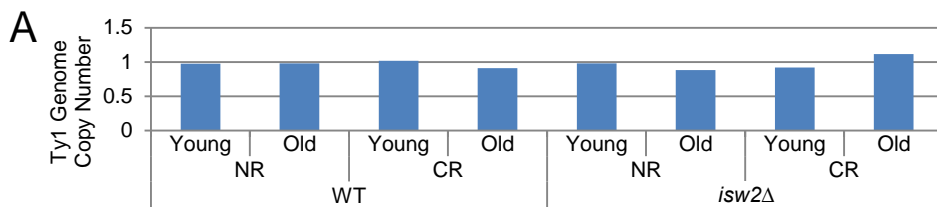

**B**

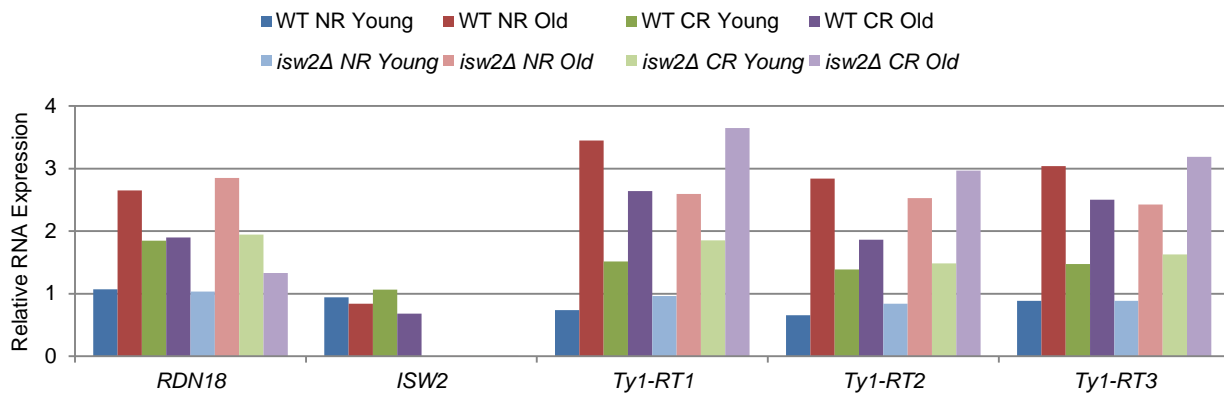

**C**

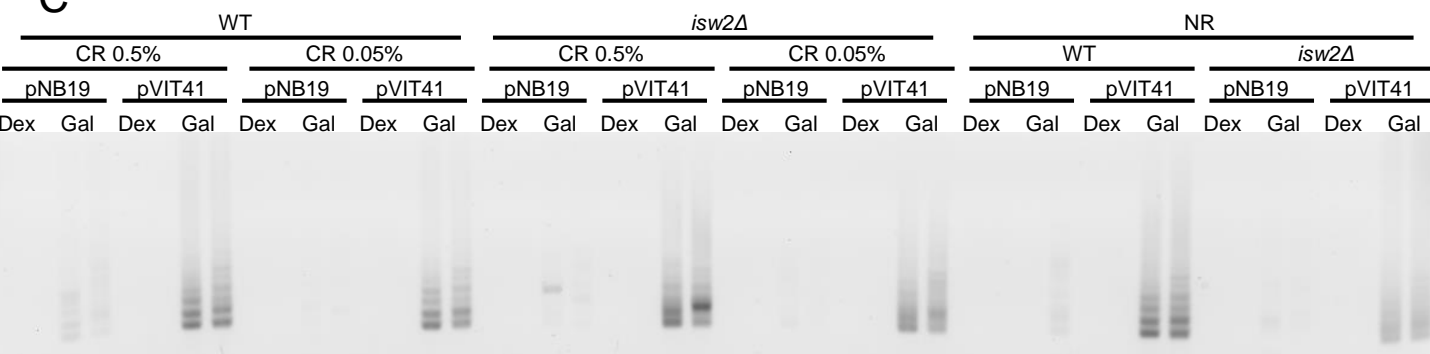

**D**

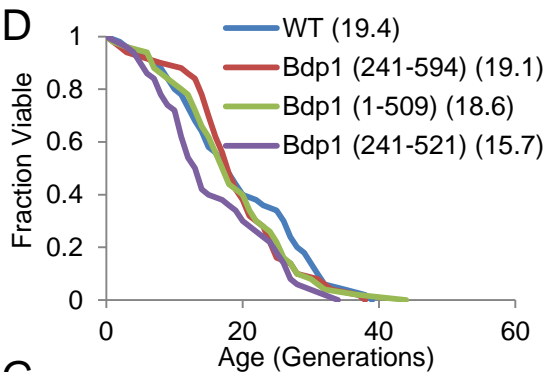

**E**

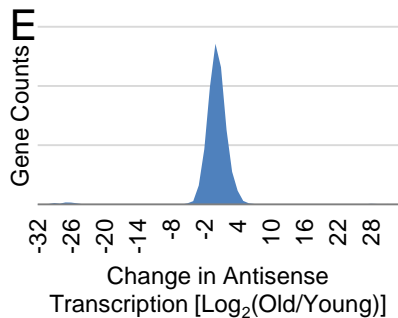

**F**

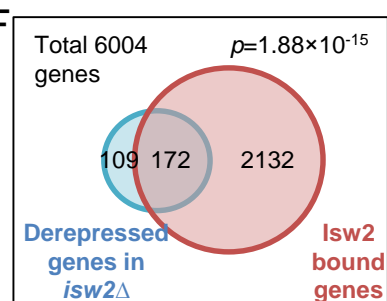

**G**

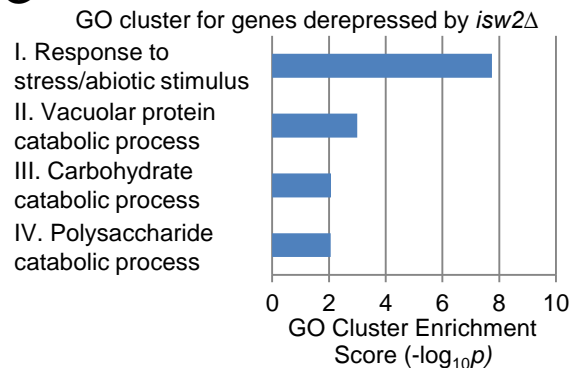

**H**

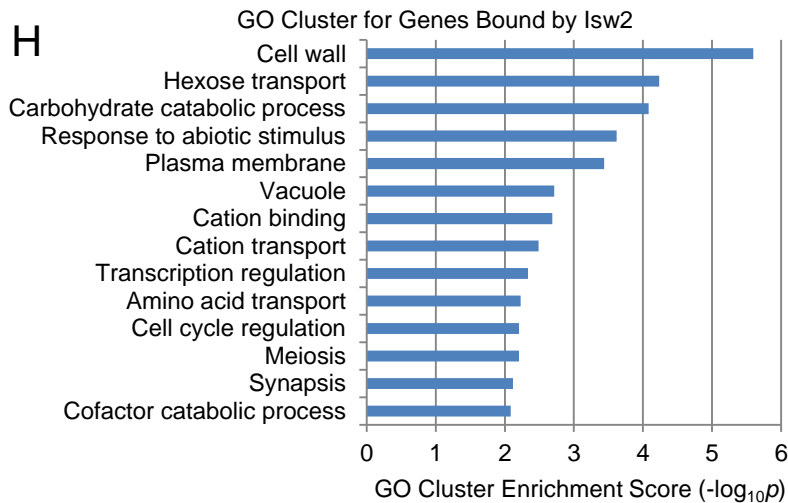

Figure S3

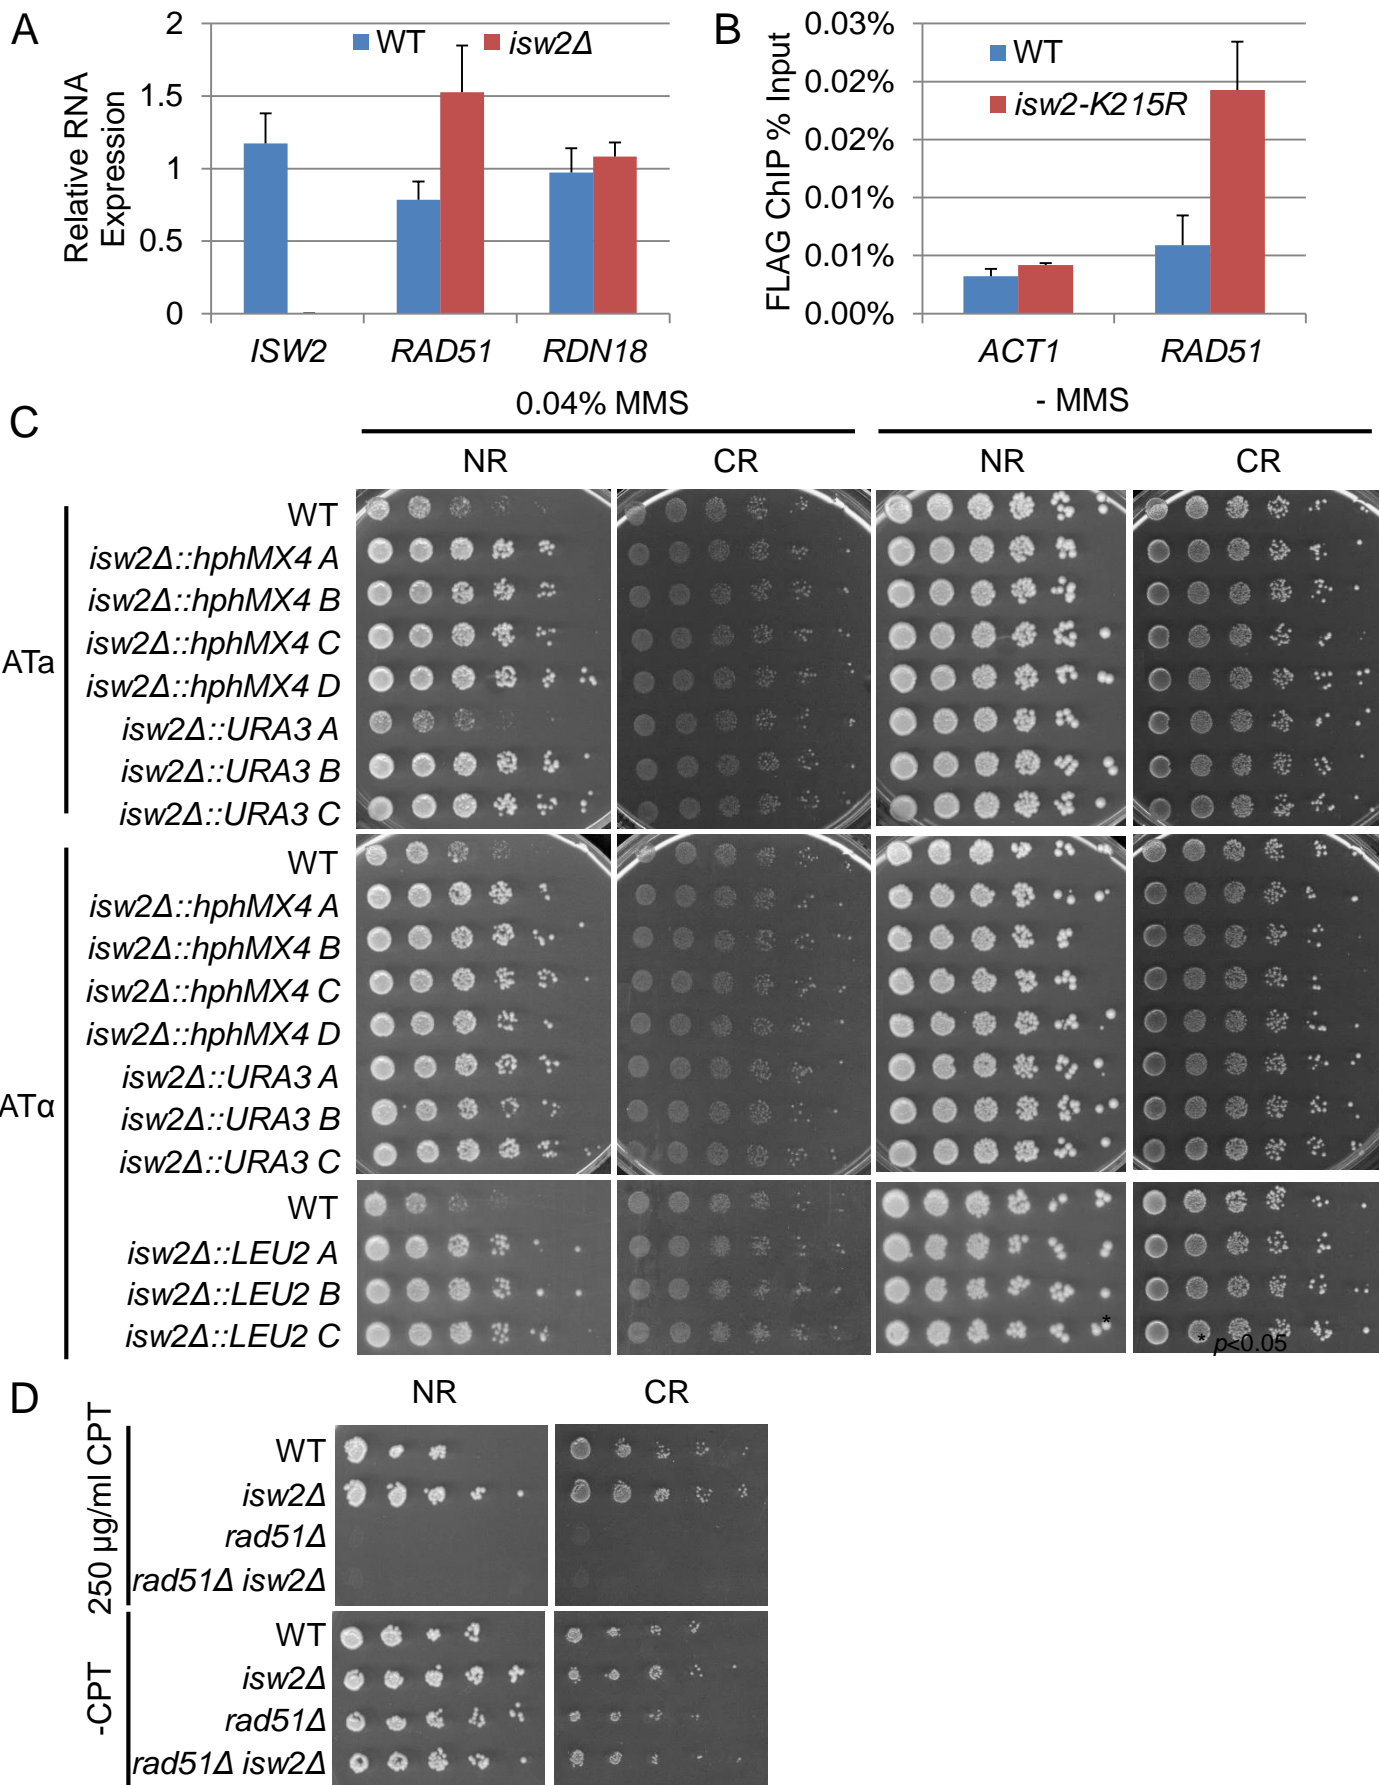

Figure S4

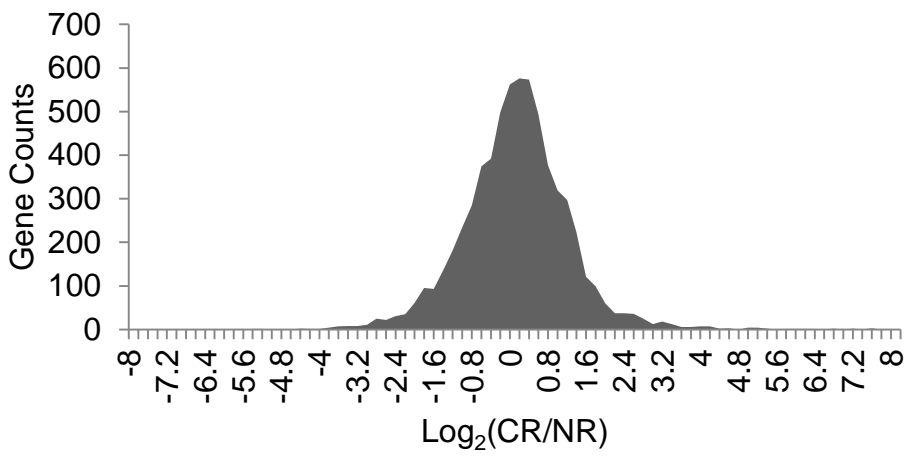

Figure S5

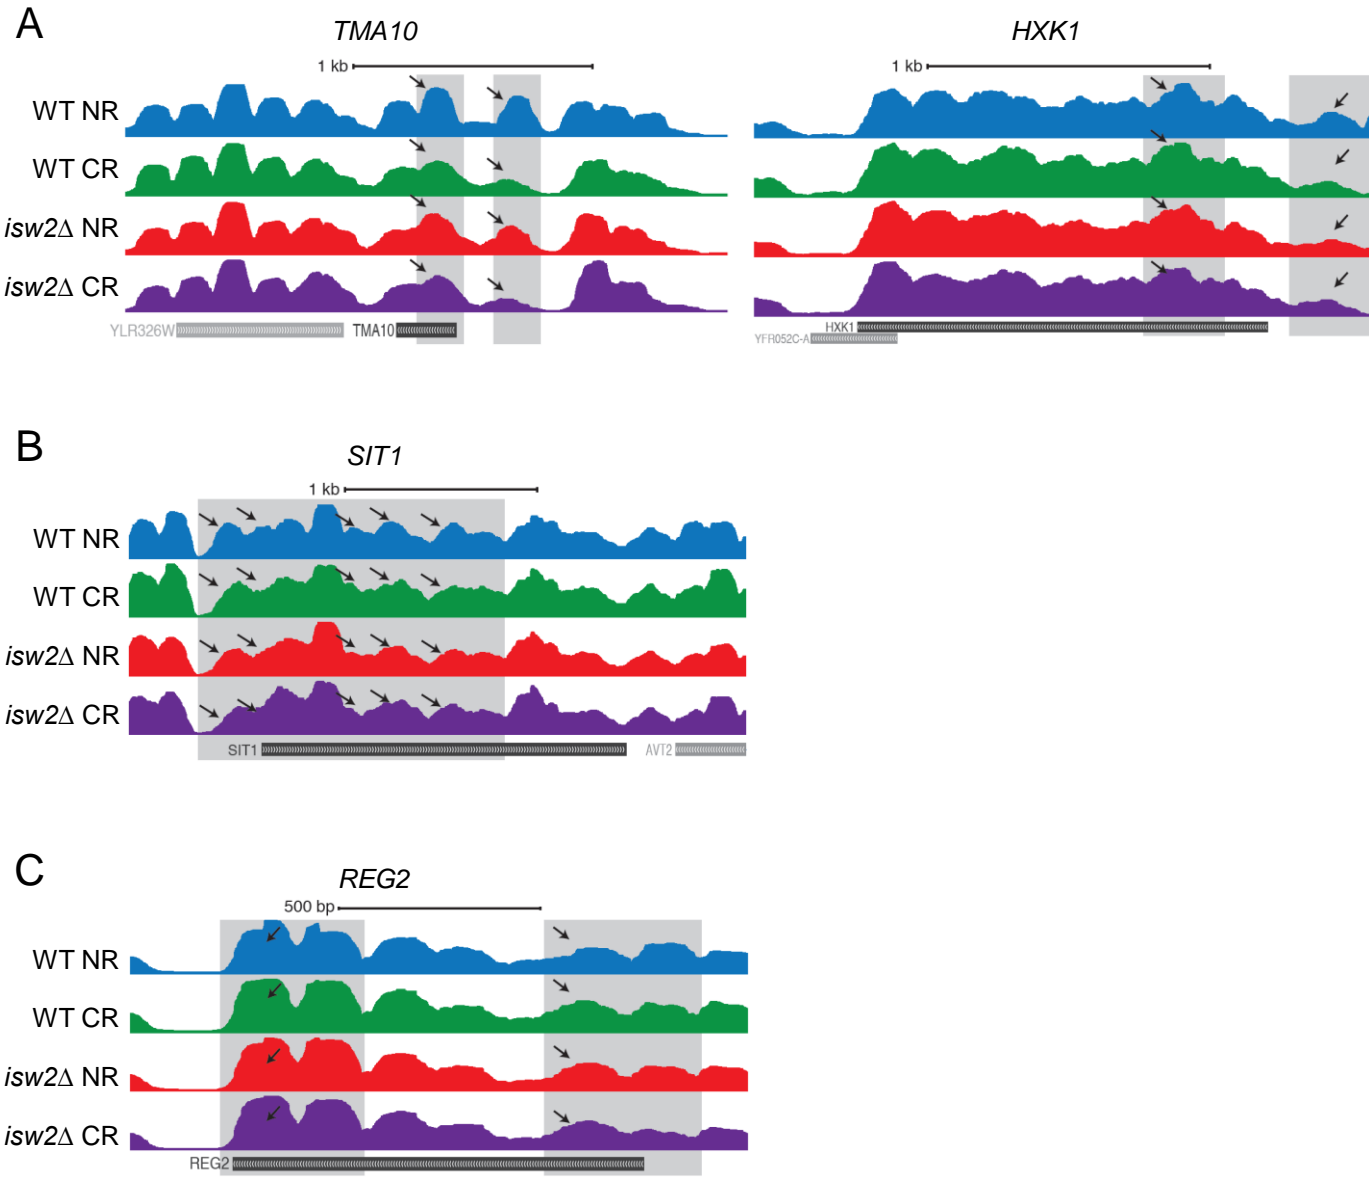

Figure S6

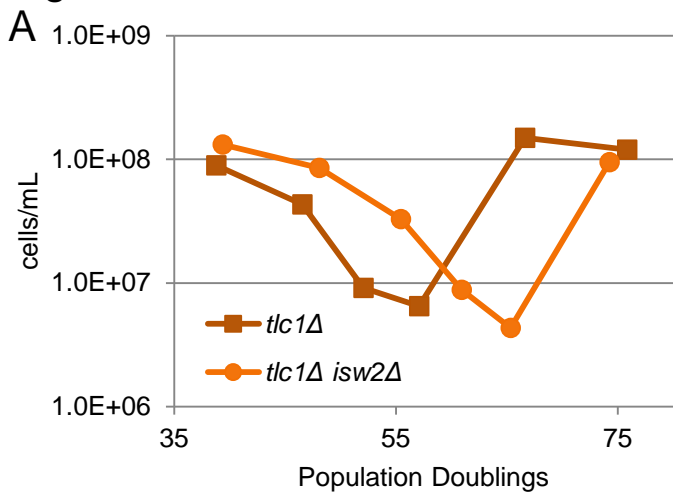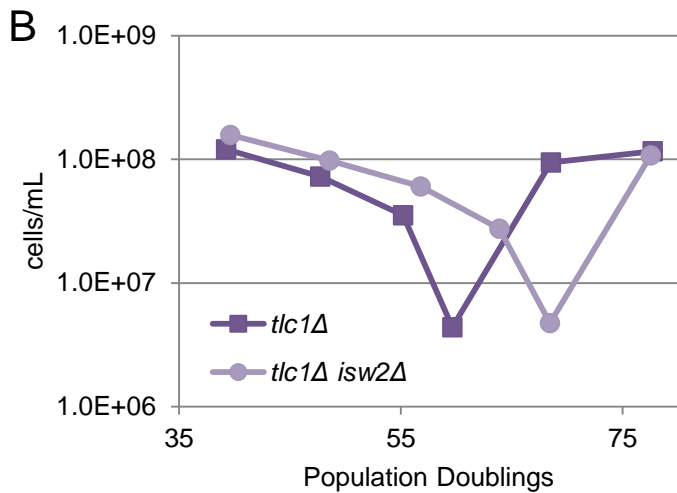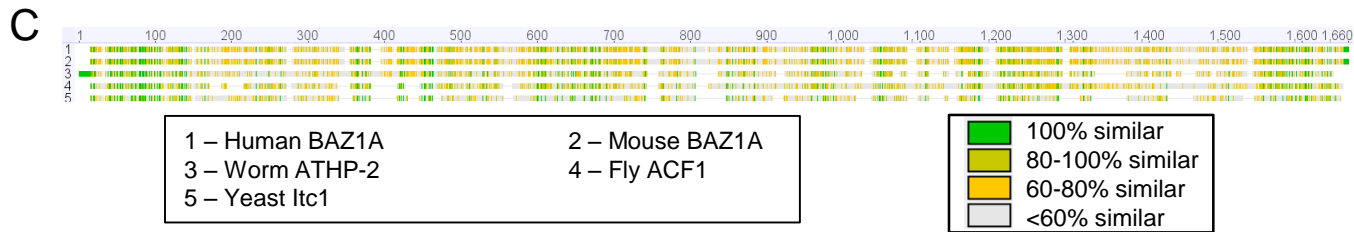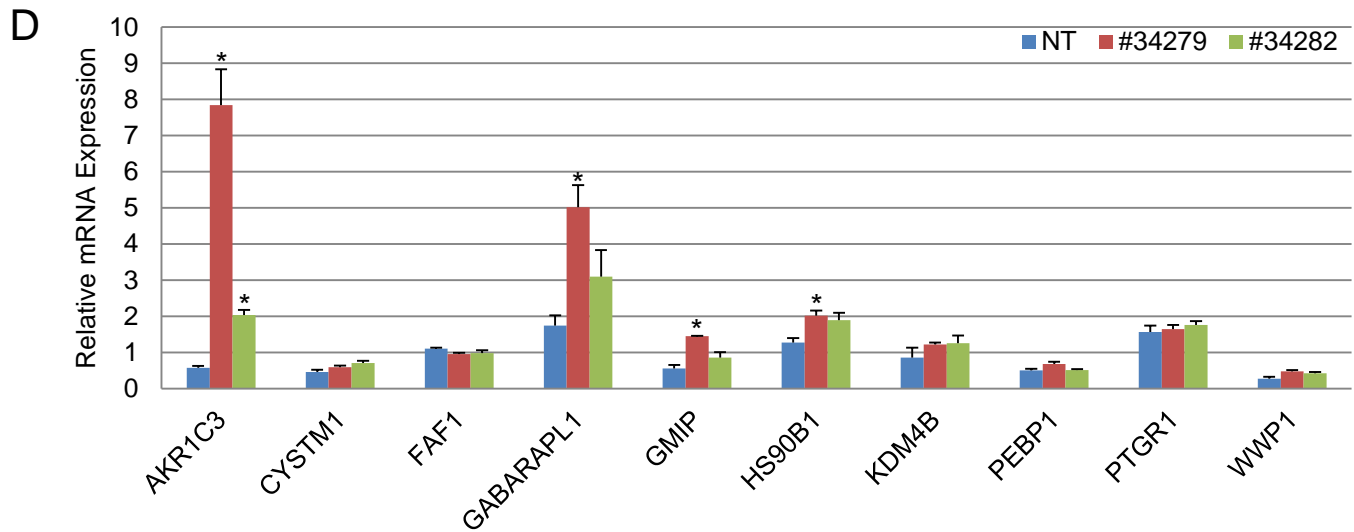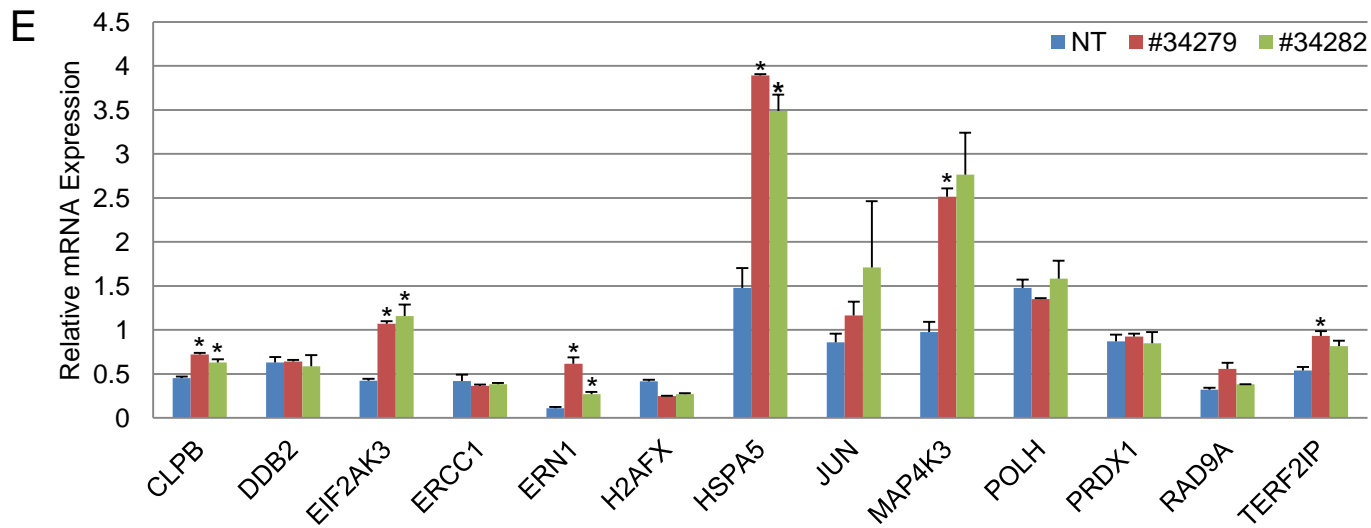

Supplement: NIHMS594983-supplement-01.pdf [file NIHMS594983-supplement-01.pdf]
